# Supplementary material
Source: publisher figshare collection journal article supplement (https://acs.figshare.com/ndownloader/files/15533825)
Supplement: Supplementary file 1 [file 15533825]

**Fast Pyrolysis of Cellulose, Hemicellulose, and Lignin: Effect of Operating Temperature on Bio-oil Yield and Composition and Insights into the Intrinsic Pyrolysis Chemistry**

Khursheed B. Ansari<sup>†1</sup>, Jyotsna S. Arora<sup>†</sup>, Jia Wei Chew<sup>†</sup>,

Paul J. Dauenhauer<sup>‡</sup>, and Samir H. Mushrif<sup>§\*</sup>

<sup>†</sup> School of Chemical and Biomedical Engineering, Nanyang Technological University, 62 Nanyang Drive, Singapore 637459

<sup>‡</sup> Department of Chemical Engineering and Materials Science, University of Minnesota, Amundson Hall, 421 Washington Avenue SE, Minneapolis, Minnesota 55455, USA

<sup>§</sup> Department of Chemical and Materials Engineering, University of Alberta, 9211-116 St NW, Edmonton, Alberta T6G 1H9, Canada

---

<sup>1</sup> Current Affiliation: Department of Chemical Engineering, Aligarh Muslim University, AMU Campus, Aligarh 201002 Uttar Pradesh, India

**Table 1 of the supporting information**

Table 1 depict summary of the products identified through gas chromatography (GC) retention time, mass spectroscopy (MS) during cellulose, xylan, and lignin thin-film pyrolysis. The pyrolysis volatile product such as non-condensable gases, light oxygenates, furanic compounds, pyrans, anhydrosugars, and phenolic compounds are identified using the mass spectrum as well as comparison with pure standards as mentioned previously.<sup>1</sup>

Table T1: Summary of identified pyrolysis products in cellulose, xylan, and lignin thin-film pyrolysis

| Compound              | Structure                                                                           | Retention time | Molar mass | Major ion fragments |                 |                                        |
|-----------------------|-------------------------------------------------------------------------------------|----------------|------------|---------------------|-----------------|----------------------------------------|
| Non-condensable gases |                                                                                     |                |            |                     |                 |                                        |
|                       |                                                                                     |                |            | Ion                 | Relative height | Fragment loss                          |
| Carbon monoxide       | :C ≡ O:                                                                             | 4.35           | 28         | 28                  | 999             | -                                      |
| Carbon dioxide        | O = C = O                                                                           | 5.66           | 44         | 44                  | 999             | -                                      |
| Linear oxygenates     |                                                                                     |                |            |                     |                 |                                        |
| Formaldehyde          | 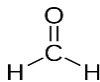 | 2.29           | 30         | Ion                 | Relative height | Fragment loss                          |
|                       |                                                                                     |                |            | 30                  | 560             | -                                      |
|                       |                                                                                     |                |            | 29                  | 999             | -H (-1)                                |
|                       |                                                                                     |                |            | 28                  | 210             | -H (-1)                                |
| Methanol              |  | 2.7            | 32         | 32                  | 745             | -                                      |
|                       |                                                                                     |                |            | 31                  | 999             | -H (-1)                                |
|                       |                                                                                     |                |            | 29                  | 440             | -H <sub>2</sub> (-2)                   |
| Acetaldehyde          |  | 2.89           | 44         | 44                  | 125             | -                                      |
|                       |                                                                                     |                |            | 29                  | 999             | -CH <sub>3</sub> (-15)                 |
| Glyoxal               |  | 3.50           | 58         | 58                  | 67              |                                        |
|                       |                                                                                     |                |            | 44                  | 190             | -CH <sub>2</sub> (-14)                 |
|                       |                                                                                     |                |            | 29                  | 999             | -                                      |
| Methyl Glyoxal        |  | 3.63           | 72         | 72                  | 51              | -                                      |
|                       |                                                                                     |                |            | 43                  | 999             | -CHO (-29)                             |
| Formic acid           |  | 4.01           | 46         | 46                  | 999             | -                                      |
|                       |                                                                                     |                |            | 45                  | 908             | -H (-1)                                |
| Glycolaldehyde        |  | 6.27           | 60         | 60                  | 79              | -                                      |
|                       |                                                                                     |                |            | 32                  | 485             | -CO (-28)                              |
|                       |                                                                                     |                |            | 31                  | 999             | -H (-1)                                |
| 2,3-butanedione       |  | 6.57           | 86         | 86                  | 180             | -                                      |
|                       |                                                                                     |                |            | 55                  | 366             | -CH <sub>3</sub> O (-31)               |
|                       |                                                                                     |                |            | 43                  | 999             | -C <sub>2</sub> H <sub>3</sub> O (-43) |
| Acetic acid           |  | 7.01           | 60         | 60                  | 999             | -                                      |
|                       |                                                                                     |                |            | 45                  | 910             | -CH <sub>3</sub> (-15)                 |
|                       |                                                                                     |                |            | 43                  | 868             | -H <sub>2</sub> (-2)                   |
|                       |                                                                                     | 7.53           | 88         | 88                  | 75              | -                                      |

|                                                     |                                                                                     |       |     |     |     |                                        |
|-----------------------------------------------------|-------------------------------------------------------------------------------------|-------|-----|-----|-----|----------------------------------------|
| 1-hydroxy-2-butanone                                | 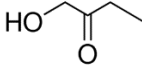   |       |     | 57  | 738 | -CH <sub>3</sub> O (-31)               |
|                                                     |                                                                                     |       |     | 29  | 999 | (-59) <sup>b</sup>                     |
| Hydroxyacetone                                      |    | 11.06 | 74  | 74  | 110 | -                                      |
|                                                     |                                                                                     |       |     | 43  | 999 | (-31)                                  |
| Butyl glycol                                        |    | 43.58 | 118 | 87  | 210 | -CH <sub>3</sub> O (-31)               |
|                                                     |                                                                                     |       |     | 57  | 999 | (-61) <sup>b</sup>                     |
|                                                     |                                                                                     |       |     | 45  | 436 | (-73) <sup>b</sup>                     |
| 2-cyclohexene-1-ol                                  |    | 44.08 | 98  | 98  | 306 | -                                      |
|                                                     |                                                                                     |       |     | 97  | 345 | -H (-1)                                |
|                                                     |                                                                                     |       |     | 70  | 999 | -CO(-28)                               |
|                                                     |                                                                                     |       |     | 55  | 368 | -C <sub>2</sub> H <sub>3</sub> O (-43) |
| 1,2-cyclopentanedione <sup>a</sup>                  |    | 44.78 | 98  | 98  | 999 | -                                      |
|                                                     |                                                                                     |       |     | 69  | 161 | - CHO (-29)                            |
|                                                     |                                                                                     |       |     | 55  | 422 | -C <sub>2</sub> H <sub>3</sub> O (-43) |
| 2-hydroxy-3-methyl-2-cyclopenten-1-one <sup>a</sup> |    | 53.37 | 112 | 112 | 999 | -                                      |
|                                                     |                                                                                     |       |     | 83  | 185 | - CHO (-29)                            |
|                                                     |                                                                                     |       |     | 69  | 353 | -C <sub>2</sub> H <sub>3</sub> O (-43) |
|                                                     |                                                                                     |       |     | 55  | 217 | (-57)                                  |
| 3-methylcyclopentane, 1,2-dione                     |    | 53.86 | 112 | 112 | 999 | -                                      |
|                                                     |                                                                                     |       |     | 83  | 181 | - CHO (-29)                            |
|                                                     |                                                                                     |       |     | 69  | 354 | - CH <sub>2</sub> (-14)                |
|                                                     |                                                                                     |       |     | 55  | 317 | (-57) <sup>b</sup>                     |
| 1,3-dioxane-5-methanol, 5-ethyl-                    |   | 68.92 | 146 | 145 | 25  | -H (-1)                                |
|                                                     |                                                                                     |       |     | 86  | 494 | (-59) <sup>b</sup>                     |
|                                                     |                                                                                     |       |     | 71  | 226 | (-74) <sup>b</sup>                     |
|                                                     |                                                                                     |       |     | 57  | 999 | (-88) <sup>b</sup>                     |
| <b>Furanic compounds</b>                            |                                                                                     |       |     |     |     |                                        |
| Furan                                               |  | 3.79  | 68  | 68  | 999 | -                                      |
|                                                     |                                                                                     |       |     | 39  | 560 | - CHO (-29)                            |
| 2-methylfuran                                       |  | 7.78  | 82  | 82  | 999 | -                                      |
|                                                     |                                                                                     |       |     | 53  | 439 | - CHO (-29)                            |
|                                                     |                                                                                     |       |     | 39  | 360 | - CH <sub>2</sub> (-14)                |
| 2(3H), furanone, 5-methyl                           |  | 13.6  | 98  | 98  | 932 | -                                      |
|                                                     |                                                                                     |       |     | 55  | 999 | -C <sub>2</sub> H <sub>3</sub> O (-43) |
|                                                     |                                                                                     |       |     | 43  | 785 | (-55) <sup>b</sup>                     |
| 2, 5-dimethylfuran                                  |  | 15.56 | 96  | 96  | 999 | -                                      |
|                                                     |                                                                                     |       |     | 95  | 810 | - H (-1)                               |
|                                                     |                                                                                     |       |     | 81  | 295 | - CH <sub>3</sub> (-15)                |
|                                                     |                                                                                     |       |     | 53  | 362 | -C <sub>2</sub> H <sub>3</sub> O (-43) |
| Furanone 2, 5(H)                                    |  | 29.38 | 84  | 84  | 999 | -                                      |
|                                                     |                                                                                     |       |     | 55  | 120 | - CHO (-29)                            |
|                                                     |                                                                                     |       |     | 54  | 490 | - CH <sub>2</sub> O (-30)              |
| Furfural                                            |  | 34.24 | 96  | 96  | 999 | -                                      |
|                                                     |                                                                                     |       |     | 95  | 950 | - H (-1)                               |
| 2-furanmethanol                                     |  | 38.43 | 98  | 98  | 999 | -                                      |
|                                                     |                                                                                     |       |     | 81  | 570 | - OH (-17)                             |
|                                                     |                                                                                     |       |     | 69  | 410 | - CHO (-29)                            |

|                                                                |                                                                                     |       |     |     |     |                                        |
|----------------------------------------------------------------|-------------------------------------------------------------------------------------|-------|-----|-----|-----|----------------------------------------|
|                                                                |                                                                                     |       |     | 53  | 328 | (-45) <sup>b</sup>                     |
| Acetylfuran                                                    | 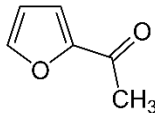   | 43.99 | 110 | 110 | 425 | -                                      |
|                                                                |                                                                                     |       |     | 95  | 999 | - CH <sub>3</sub> (-15)                |
|                                                                |                                                                                     |       |     | 84  | 615 | (-26) <sup>b</sup>                     |
| 5-methylfurfural                                               |    | 48.36 | 110 | 110 | 999 | -                                      |
|                                                                |                                                                                     |       |     | 109 | 788 | - H (-1)                               |
|                                                                |                                                                                     |       |     | 81  | 205 | - CHO (-29)                            |
| 2,3-dihydrobenzofuran                                          |    | 66.07 | 120 | 120 | 999 | -                                      |
|                                                                |                                                                                     |       |     | 119 | 265 | - H (-1)                               |
|                                                                |                                                                                     |       |     | 91  | 728 | - CHO (-29)                            |
| Hydroxymethylfurfural                                          |    | 66.85 | 126 | 126 | 999 | -                                      |
|                                                                |                                                                                     |       |     | 97  | 980 | - CHO (-29)                            |
|                                                                |                                                                                     |       |     | 69  | 226 | (-57) <sup>b</sup>                     |
|                                                                |                                                                                     |       |     | 53  | 105 | (-73 <sup>b</sup> )                    |
| Pyrans                                                         |                                                                                     |       |     |     |     |                                        |
| 2,3-dihydro-3,5-dihydroxy-6-methyl-4H-Pyran-4-one <sup>a</sup> |    | 61.61 | 144 | 144 | 361 | -                                      |
|                                                                |                                                                                     |       |     | 101 | 614 | -C <sub>2</sub> H <sub>3</sub> O (-43) |
|                                                                |                                                                                     |       |     | 73  | 999 | (-71) <sup>b</sup>                     |
| 1,5-anhydro-4-deoxy-D-glycero-hex-1-en-3-ulose <sup>a</sup>    |   | 70.97 | 144 | 144 | 140 | -                                      |
|                                                                |                                                                                     |       |     | 113 | 182 | - CH <sub>3</sub> O (-31)              |
|                                                                |                                                                                     |       |     | 69  | 999 | (-75) <sup>b</sup>                     |
|                                                                |                                                                                     |       |     | 57  | 375 | (-87) <sup>b</sup>                     |
| Anhydrosugars                                                  |                                                                                     |       |     |     |     |                                        |
| Levogluosenone                                                 |  | 58.63 | 126 | 126 | 121 | -                                      |
|                                                                |                                                                                     |       |     | 98  | 999 | - CO (-28)                             |
|                                                                |                                                                                     |       |     | 68  | 790 | - CH <sub>2</sub> O (-30)              |
|                                                                |                                                                                     |       |     | 53  | 550 | (-73) <sup>b</sup>                     |
| 1,4:3,6-dihydro-alpha-d-glucopyranose <sup>a</sup>             |  | 64.95 | 144 | 144 | 125 | -                                      |
|                                                                |                                                                                     |       |     | 98  | 340 | (-46) <sup>b</sup>                     |
|                                                                |                                                                                     |       |     | 69  | 999 | (-75) <sup>b</sup>                     |
|                                                                |                                                                                     |       |     | 57  | 380 | (-87) <sup>b</sup>                     |
| 3,4-Altrosan                                                   |  | 73.68 | 162 | 98  | 120 | (- 64) <sup>b</sup>                    |
|                                                                |                                                                                     |       |     | 73  | 574 | -89) <sup>b</sup>                      |
|                                                                |                                                                                     |       |     | 60  | 999 | (-102) <sup>b</sup>                    |
|                                                                |                                                                                     |       |     | 57  | 644 | (-105) <sup>b</sup>                    |
| Levoglucozan                                                   |  | 76.34 | 162 | 98  | 100 | (-64) <sup>b</sup>                     |
|                                                                |                                                                                     |       |     | 73  | 458 | (-89) <sup>b</sup>                     |
|                                                                |                                                                                     |       |     | 60  | 999 | (-102) <sup>b</sup>                    |
|                                                                |                                                                                     |       |     | 57  | 441 | (-105) <sup>b</sup>                    |
| 1,6-anhydroglucofuranose <sup>a</sup>                          |  | 78.05 | 162 | 73  | 999 | (-46) <sup>b</sup>                     |
|                                                                |                                                                                     |       |     | 69  | 341 | (-89) <sup>b</sup>                     |
|                                                                |                                                                                     |       |     | 57  | 185 | (-105) <sup>b</sup>                    |

| Phenolic compounds         |                                                                                     |       |     |     |     |                                        |
|----------------------------|-------------------------------------------------------------------------------------|-------|-----|-----|-----|----------------------------------------|
| Phenol                     | 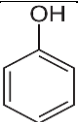   | 50.47 | 94  | 94  | 999 | -                                      |
|                            |                                                                                     |       |     | 66  | 380 | - CO (-28)                             |
|                            |                                                                                     |       |     | 39  | 245 | (-55) <sup>b</sup>                     |
| 2-methylphenol             |    | 55.53 | 108 | 108 | 999 | -                                      |
|                            |                                                                                     |       |     | 90  | 210 | -H <sub>2</sub> O (-18)                |
|                            |                                                                                     |       |     | 79  | 249 | - CHO (-29)                            |
| p-Cresol                   |    | 56.75 | 108 | 108 | 840 | -                                      |
|                            |                                                                                     |       |     | 107 | 999 | - H (-1)                               |
|                            |                                                                                     |       |     | 79  | 215 | - CHO (-29)                            |
| 2-methoxyphenol            |    | 57.85 | 124 | 124 | 795 | -                                      |
|                            |                                                                                     |       |     | 109 | 999 | - CH <sub>3</sub> (-15)                |
|                            |                                                                                     |       |     | 81  | 684 | -C <sub>2</sub> H <sub>3</sub> O (-43) |
| 2,3-dimethylphenol         |    | 61.45 | 122 | 122 | 887 | -                                      |
|                            |                                                                                     |       |     | 107 | 999 | - CH <sub>3</sub> (-15)                |
|                            |                                                                                     |       |     | 91  | 195 | - CH <sub>3</sub> O (-31)              |
|                            |                                                                                     |       |     | 77  | 320 | (-45) <sup>b</sup>                     |
| 4-methoxy-3-methylphenol   |   | 63.84 | 138 | 138 | 860 | -                                      |
|                            |                                                                                     |       |     | 123 | 999 | - CH <sub>3</sub> (-15)                |
|                            |                                                                                     |       |     | 95  | 184 | -C <sub>2</sub> H <sub>3</sub> O (-43) |
|                            |                                                                                     |       |     | 67  | 275 | (-71) <sup>b</sup>                     |
| Creosol                    |  | 64.83 | 138 | 138 | 999 | -                                      |
|                            |                                                                                     |       |     | 123 | 869 | - CH <sub>3</sub> (-15)                |
|                            |                                                                                     |       |     | 95  | 360 | -C <sub>2</sub> H <sub>3</sub> O (-43) |
|                            |                                                                                     |       |     | 77  | 171 | (-61) <sup>b</sup>                     |
| 2-(4-methoxyphenyl)ethanol |  | 67.39 | 152 | 152 | 175 | -                                      |
|                            |                                                                                     |       |     | 121 | 999 | - CH <sub>3</sub> O (-31)              |
|                            |                                                                                     |       |     | 77  | 164 | (-75) <sup>b</sup>                     |
| 4-ethyl-2-methoxyphenol    |  | 69.72 | 152 | 152 | 315 | -                                      |
|                            |                                                                                     |       |     | 137 | 999 | - CH <sub>3</sub> (-15)                |
|                            |                                                                                     |       |     | 122 | 137 | - CH <sub>2</sub> O (-30)              |
| 2-methoxy-4-vinylphenol    |  | 71.21 | 150 | 150 | 975 | -                                      |
|                            |                                                                                     |       |     | 135 | 999 | - CH <sub>3</sub> (-15)                |
|                            |                                                                                     |       |     | 107 | 673 | -C <sub>2</sub> H <sub>3</sub> O (-43) |
|                            |                                                                                     |       |     | 77  | 660 | (-73) <sup>b</sup>                     |
| Eugenol                    |  | 72.76 | 164 | 164 | 999 | -                                      |
|                            |                                                                                     |       |     | 149 | 354 | - CH <sub>3</sub> (-15)                |
|                            |                                                                                     |       |     | 131 | 325 | (-33) <sup>b</sup>                     |
|                            |                                                                                     |       |     | 103 | 360 | (-61) <sup>b</sup>                     |
|                            |                                                                                     |       |     | 91  | 265 | (-73) <sup>b</sup>                     |
| Vanillin                   |  | 74.17 | 152 | 152 | 930 | -                                      |
|                            |                                                                                     |       |     | 151 | 999 | - H (-1)                               |
|                            |                                                                                     |       |     | 123 | 185 | - CHO (-29)                            |
|                            |                                                                                     |       |     | 109 | 230 | -C <sub>2</sub> H <sub>3</sub> O (-43) |

|                                   |                                                                                   |       |     |     |     |                                        |
|-----------------------------------|-----------------------------------------------------------------------------------|-------|-----|-----|-----|----------------------------------------|
|                                   |                                                                                   |       |     | 81  | 304 | (-71) <sup>b</sup>                     |
| Isoeugenol                        | 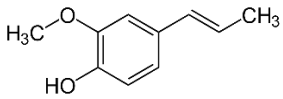 | 75.48 | 164 | 164 | 999 | -                                      |
|                                   |                                                                                   |       |     | 149 | 398 | - CH <sub>3</sub> (-15)                |
|                                   |                                                                                   |       |     | 131 | 261 | (-33) <sup>b</sup>                     |
|                                   |                                                                                   |       |     | 121 | 210 | -C <sub>2</sub> H <sub>3</sub> O (-43) |
|                                   |                                                                                   |       |     | 109 | 205 | (-55) <sup>b</sup>                     |
| Apocynin                          |  | 76.44 | 166 | 166 | 425 | -                                      |
|                                   |                                                                                   |       |     | 151 | 999 | - CH <sub>3</sub> (-15)                |
|                                   |                                                                                   |       |     | 123 | 208 | -C <sub>2</sub> H <sub>3</sub> O (-43) |
| 4-Hydroxy-3-methoxyphenyl acetone |  | 77.47 | 180 | 180 | 290 | -                                      |
|                                   |                                                                                   |       |     | 137 | 999 | -C <sub>2</sub> H <sub>3</sub> O (-43) |
|                                   |                                                                                   |       |     | 122 | 220 | - CH <sub>3</sub> (-15)                |
|                                   |                                                                                   |       |     | 94  | 215 | - CO (-28)                             |
|                                   |                                                                                   |       |     | 43  | 490 | (-51) <sup>b</sup>                     |

a = Compounds identified using mass spectrometry (MS) only

b = Unknown molecular fragments of the compound detected in MS

## Appendix 1

**[A]:** Levoglucosan (LGA) conversion into Methyl glyoxal (MG) and Hydroxyacetone (HAA) during cellulose thin-film pyrolysis

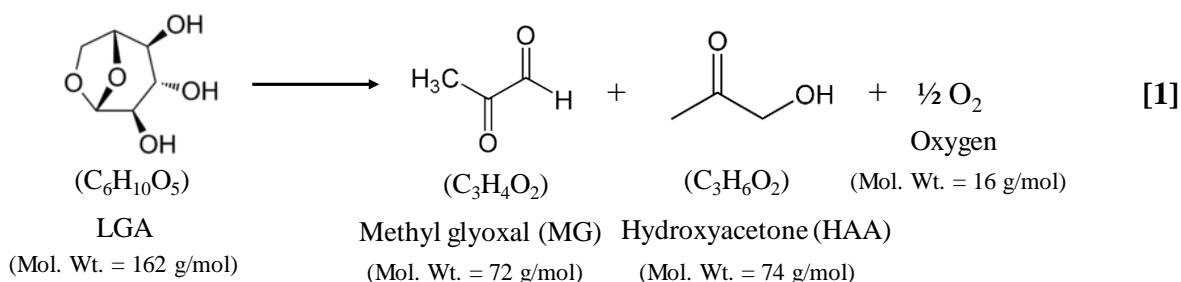

Reaction [1] show the conversion of LGA into methyl glyoxal and hydroxyacetone along with the oxygen formation. The oxygen generated is apparently utilized insitu and contribute in the formation of other volatile products of cellulose pyrolysis as shown in Appendix 1[B]. The stoichiometry of reaction [A] on weight basis is as follows,

162 gm of LGA gives 72 gm of MG, 74 gm of HAA, and 16 gm of oxygen

Thus, 1 gm of LGA gives 0.444 gm of MG and 0.456 gm of HAA, and 0.098 gm of oxygen

**For increase in the pyrolysis temperature from 300 °C to 400 °C:**

Decrease in LGA yield = 3.8 wt%

Increase in MG yield = 5.04 wt%;    Increase in HAA yield = 1.74 wt%

The yield of LGA required to produce 5.04 wt% of MG =  $5.04 \times 0.444 = 2.4$  wt%

The yield of LGA required to produce 1.74 wt% of HAA =  $1.74 \times 0.456 = 0.79$  wt%

Thus, 5.04 wt% of MG and 1.74 wt% of HAA are produced from ~ 3.2 wt% of LGA, which apparently agreed with the decrease in LGA yield (~ 3.8 wt%) in between 300 °C – 400 °C.

**[B]:** LGA conversion into Methyl glyoxal (MG), Formic acid (FA), and Glycolaldehyde (GL) during cellulose thin-film pyrolysis

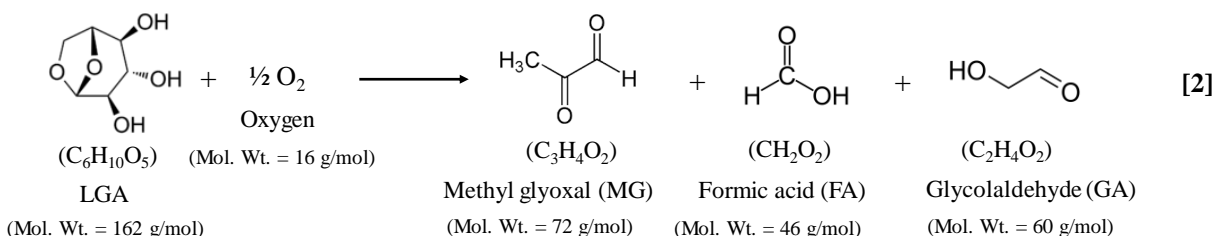

Reaction [2] show the LGA combines with the insitu generated oxygen from reaction [1] and apparently converter into methyl glyoxal, formic acid, and glycolaldehyde. The stoichiometry of reaction [2] on weight basis is as follows,

178 gm of LGA/O<sub>2</sub> gives 72 gm of MG, 46 gm of FA, and 60 gm of GA

Thus, 1 gm of LGA/O<sub>2</sub> gives 0.404 gm of MG, 0.258 gm of FA, and 0.337 gm of GA

**For increase in the pyrolysis temperature from 400 °C to 500 °C:**

Decrease in LGA yield = 4.1 wt%

Increase in MG yield = 3.58 wt%; Increase in FA yield = 5.1 wt%;

Increase in GA yield = 1.85 wt%

The yield of LGA required to produce 3.58 wt% of MG =  $3.58 \times 0.404 = 1.45$  wt%

The yield of LGA required to produce 5.1 wt% of FA =  $5.1 \times 0.258 = 1.32$  wt%

The yield of LGA required to produce 1.85 wt% of GA =  $1.85 \times 0.337 = 0.62$  wt%

Thus, 3.58 wt% of MG, 5.1 wt% of FA, and 1.85 wt% of GA are produced from ~ 3.4 wt% of LGA, which closely matched with the decrease in LGA yield (~ 4 wt%) in between 400 °C – 500 °C.

**[C]:** 1, 6-anhydroglucofuranose (AGF) conversion into Furfural and Formic acid (FA) during cellulose thin-film pyrolysis

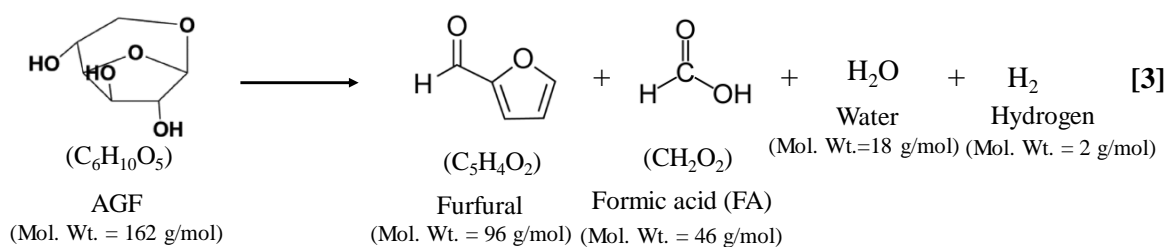

Reaction [3] show the AGF conversion into furfural and formic acid along with water and hydrogen as additional compounds. The hydrogen generated can be utilized insitu for hydrodeoxygenation reaction as shown later in appendix 1[G]. The stoichiometry of reaction [3] on weight basis is as follows,

162 gm of AGF gives 96 gm of furfural, 46 gm of formic acid, 18 gm of water, and 2 gm of H<sub>2</sub>

Thus, 1 gm of AGF gives 0.592 gm of furfural, 0.283 gm of formic acid, 0.11 gm of water and 0.01 gm of hydrogen

**For increase in the pyrolysis temperature from 300 °C to 400 °C:**

Decrease in AGF yield = 1.98 wt%

Increase in Furfural yield = 2.62 wt%

Increase in Formic acid yield = 4.19 wt%

The yield of AGF required to produce 2.62 wt% of furfural =  $0.592 \times 2.62 = 1.55$  wt%



The yield of AGF required to produce 4.19 wt% of formic acid =  $0.283 \times 4.19 = 1.1$  wt%

Thus, 2.62 wt% of furfural and 4.19 wt% of formic acid are produced from 2.6 wt% of AGF, which apparently agreed with the decrease in AGF yield ( $\sim 2$  wt%) in between 300 °C – 400 °C

**[D]:** Levoglucosenone (LGO) conversion into 5-Methylfurfural (5-MF) during cellulose thin-film pyrolysis

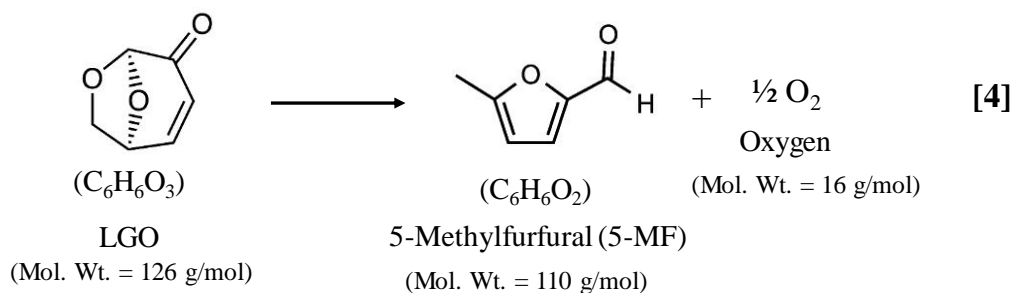

Reaction [4] show conversion of LGO into 5-methylfurfural and oxygen. Again, the additional oxygen generated from reaction [4] can utilized into the formation of other pyrolysis volatile products. The stoichiometry of reaction [4] on weight basis is as follows,

126 gm of LGO gives 110 gm of 5-methylfurfural and 16 gm of oxygen

Thus, 1 gm of LGO gives 0.873 gm of 5-methylfurfural and 0.12 gm of oxygen

**For increase in the pyrolysis temperature from 300 °C to 400 °C:**

Decrease in LGO yield = 1.6 wt%

Increase in 5-Methylfurfural yield = 0.96 wt%

The yield of LGO required to produce 0.96 wt% 5-Methylfurfural =  $0.873 \times 0.96 = 0.84$  wt%

Although, the decrease in LGO yield (1.6 wt%) seemed much higher than the increase in 5-methylfurfural, but only 5-methylfurfural yield could closely with LGO yield amongst the entire pyrolysis product distribution, over 300 °C – 400 °C.

**[E]:** LGO conversion into Furfural and Formaldehyde during cellulose thin-film pyrolysis

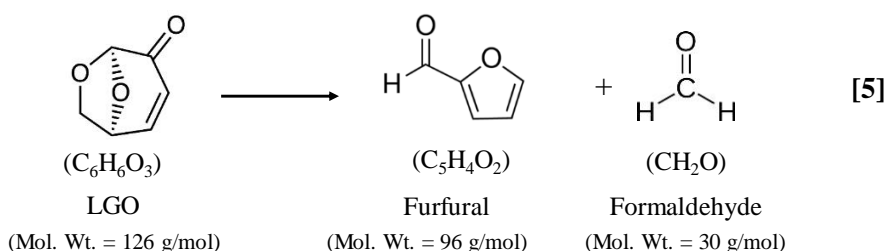

Reaction [5] depict the conversion of LGO into furfural and formaldehyde. The stoichiometry of reaction [5] on weight basis is as follows,

126 gm of LGO gives 96 gm of furfural and 30 gm of formaldehyde

Thus, 1 gm of LGO gives 0.761 gm of furfural and 0.238 gm of formaldehyde

**For increase in the pyrolysis temperature from 400 °C to 500 °C:**

Decrease in LGO yield = 0.21 wt%

Increase in furfural yield = 0.36 wt%

Increase in formaldehyde yield = 0.09 wt%

The yield of LGO required to produce 0.36 wt% of furfural =  $0.761 \times 0.36 = 0.27$  wt%

The yield of LGO required to produce 0.09 wt% of formaldehyde =  $0.238 \times 0.09 = 0.02$  wt%

Thus, 0.36 wt% of furfural and 0.09 wt% of formic acid are produced from 0.29 wt% of LGO, which apparently agreed with the decrease in LGO yield (0.21 wt%), over 400 °C – 500 °C.

**[F]:** 2,3-dihydro-3,5-dihydroxy-6-methyl-4HPyran-4-one (DHMDHP) conversion into 1, 2-Cyclopentanedione and Carbon dioxide during cellulose thin-film pyrolysis

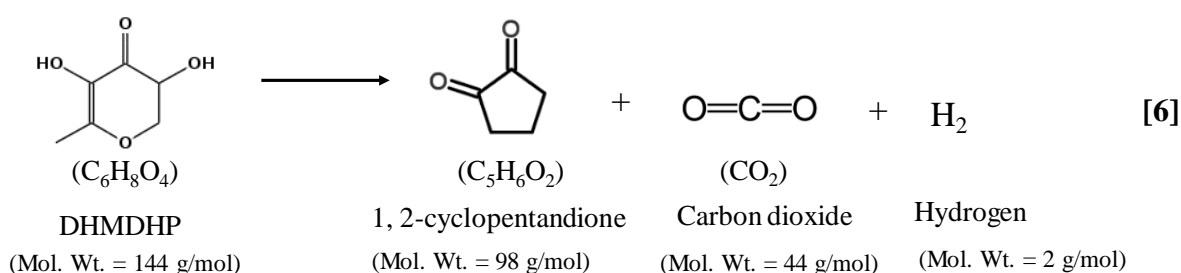

Reaction [6] show DHMDHP conversion into 1,2-cyclopentanedione and carbon dioxide with hydrogen. The extra hydrogen generated can be utilized insitu and contribute for other product formation. (cf. Appendix 1[G]). The stoichiometry of reaction [6] on weight basis is as follows, Stoichiometry (weight basis):

144 gm of DHMDHP gives 98 gm of 1, 2-cyclopentanedione, 44 gm of carbon dioxide, and 2 gm of hydrogen

Thus, 1 gm of DHMDHP gives 0.68 gm of 1, 2-cyclopentanedione and 0.305 gm of carbon dioxide, and 0.013 gm of hydrogen

**For increase in the pyrolysis temperature from 300 °C to 400 °C:**

Decrease in DHMDHP yield = 1.92 wt%

Increase in 1, 2-cyclopentanedione yield = 1.44 wt%

Increase in carbon dioxide yield = 3.62 wt%

The yield of DHMDHP required to produce 1.44 wt% of 1, 2-Cyclopentanedione =  $0.68 \times 1.44 = 0.97$  wt%

The yield of DHMDHP required to produce 3.62 wt% of carbon dioxide =  $0.305 \times 3.62 = 1.1$  wt%

Thus, 1.44 wt% of 1, 2-cyclopentanedione and 3.62 wt% of carbon dioxide are produced from 2.07 wt% of DHMDHP, which apparently agreed with the decrease in DHMDHP yield ( $\sim 1.92$  wt%) in between  $300\text{ }^{\circ}\text{C} - 400\text{ }^{\circ}\text{C}$ .

**[G]:** DHMDHP conversion into 2,5-dimethylfuran during cellulose thin-film pyrolysis

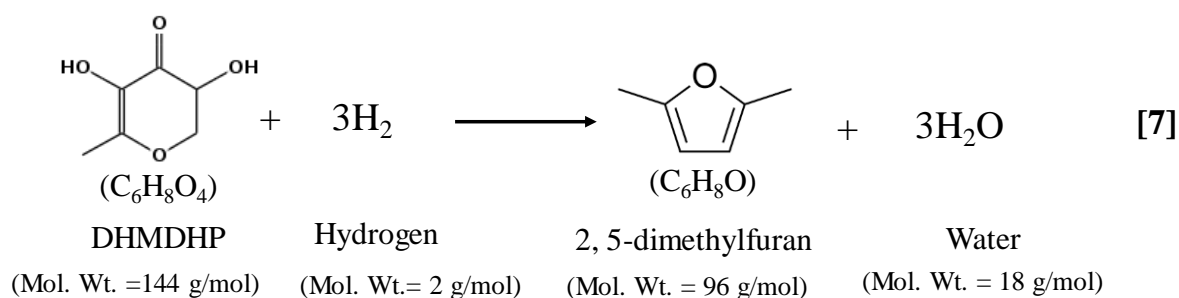

Reaction [7] show that DHMDHP combines with insitu generated hydrogen and produces 2,5-dimethylfuran and water. The stoichiometry of reaction [7] on weight basis is as follows, 150 gm of DHMDHP/H<sub>2</sub> gives 96 gm of 2, 5-dimethylfuran and 54 gm of water

Thus, 1 gm of DHMDHP/H<sub>2</sub> gives 0.64 gm of 2, 5-dimethylfuran and 0.36 gm of water

**For increase in the pyrolysis temperature from  $400\text{ }^{\circ}\text{C}$  to  $500\text{ }^{\circ}\text{C}$ :**

Decrease in DHMDHP yield = 0.51 wt%

Increase in 2, 5-dimethylfuran yield = 0.67 wt%

The yield of DHMDHP required to produce 0.67 wt% of 2, 5-dimethylfuran =  $0.67 \times 0.64 = 0.43$  wt%

Thus, 0.67 wt% of 2, 5-dimethylfuran is produced from 0.43 wt% of DHMDHP, which is in good agreement with decrease in DHMDHP yield ( $\sim 0.51$  wt%) in between  $400\text{ }^{\circ}\text{C} - 500\text{ }^{\circ}\text{C}$ .

**[H]:** 1,5-anhydro-4-deoxy-D-glycerohex-1-en-3-ulose (ADGH) conversion into Acetic acid and 2, 3-Butanedione during cellulose thin-film pyrolysis

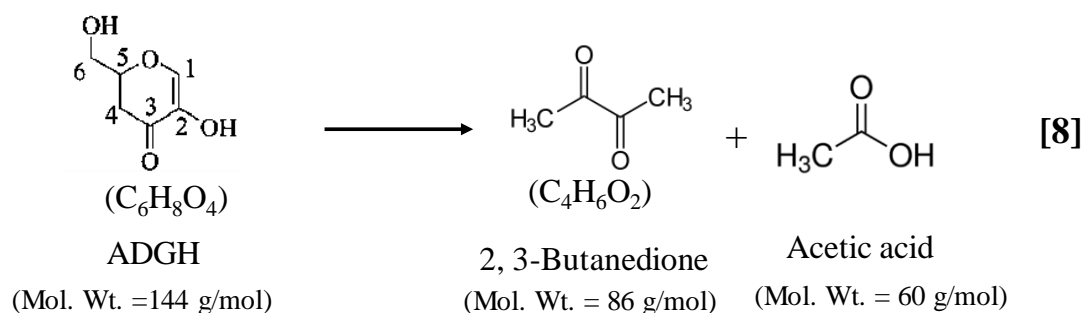

Reaction [8] depict the conversion of ADGH into 2, 3-buanedione and acetic acid. The stoichiometry of reaction [8] on weight basis is as follows,

144 gm of ADGH gives 86 gm of 2, 3-butanedione and 60 gm of acetic acid

Thus, 1 gm of ADGH gives 0.597 gm of 2, 3-butanedione and 0.416 gm of acetic acid

**For increase in the pyrolysis temperature from 300 °C to 400 °C:**

Decrease in ADGH yield = 1.5 wt%

Increase in 2, 3-butanedione yield = 1.4 wt%

Increase in acetic acid yield = 0.51 wt%

The yield of ADGH required to produce 1.4 wt% of 2, 3-butanedione =  $0.597 \times 1.4 = 0.84$  wt%

The yield of ADGH required to produce 0.51 wt% of acetic acid =  $0.416 \times 0.51 = 0.22$  wt%

Thus, 1.4 wt% of 2, 3-butanedione and 0.51 wt% of acetic acid are produced from 1.06 wt% of ADGH, which apparently agreed with the decrease in ADGH yield (~ 1.5 wt%) in between 300 °C – 400 °C.

**[I]:** ADGH conversion into 2-Methylfuran and Carbon dioxide during cellulose thin-film pyrolysis

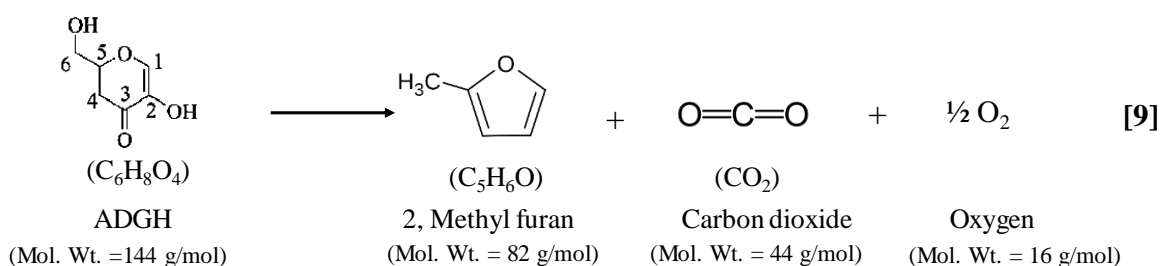

Reaction [9] show the conversion of ADGH into 2-methylfuran, carbon dioxide, and water.

The stoichiometry of reaction [9] on weight basis is as follows,

144 gm of ADGH gives 82 gm of 2-methylfuran, 44 gm of carbon dioxide, and 16 gm of oxygen

Thus, 1 gm of ADGH gives 0.569 gm of 2-methylfuran and 0.305 gm of carbon dioxide, and 0.11 gm of oxygen

**For increase in the pyrolysis temperature from 400 °C to 500 °C:**

Decrease in ADGH yield = 0.55 wt%

Increase in 2-methylfuran yield = 0.42 wt%

Increase in carbon dioxide yield = 1.13 wt%

The yield of ADGH required to produce 0.42 wt% of 2-methylfuran =  $0.569 \times 0.42 = 0.23$  wt%

The yield of ADGH required to produce 1.13 wt% of Carbon dioxide =  $0.305 \times 1.13 = 0.34$  wt%

Thus, 0.42 wt% of 2-methylfuran and 1.13 wt% of Carbon dioxide are produced from 0.57 wt% of ADGH, which apparently agreed with the decrease in ADGH yield (~ 0.55 wt%) in between 400 °C – 500 °C.

**[J]:** HMF conversion into 2-Furanmethanol and Carbon monoxide during cellulose thin-film pyrolysis

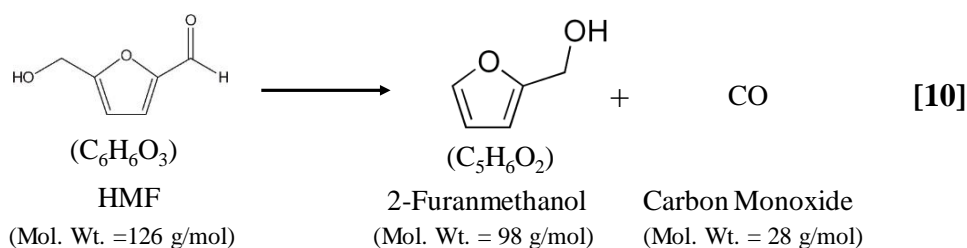

Reaction [10] show the conversion of HMF into 2-furanmethanol and carbon monoxide. The stoichiometry of reaction [10] on weight basis is as follows,

126 gm of HMF gives 98 gm of 2-furanmethanol and 28 gm of carbon monoxide

Thus, 1 gm of HMF gives 0.777 gm of 2-furanmethanol and 0.222 gm of carbon monoxide

**For increase in the pyrolysis temperature from 300 °C – 400 °C:**

The decrease in HMF yield = 1.5 wt%

Increase in 2-furanmethanol yield = 1.52 wt%

Increase in carbon monoxide yield = 1.61 wt%

The yield of HMF required to produce 1.52 wt% of 2-furanmethanol =  $0.777 \times 1.52 = 1.18$  wt%

The yield of HMF required to produce 1.61 wt% of carbon monoxide =  $0.222 \times 1.61 = 0.35$  wt%

Thus, 1.52 wt% of 2-furanmethanol and 1.61 wt% of carbon monoxide are produced from 1.53 wt% of HMF, which apparently agreed with the decrease in HMF yield (~ 1.5 wt%) in between 300 °C – 400 °C.

**[K]:** HMF conversion into 5-methylfurfural during cellulose thin-film pyrolysis

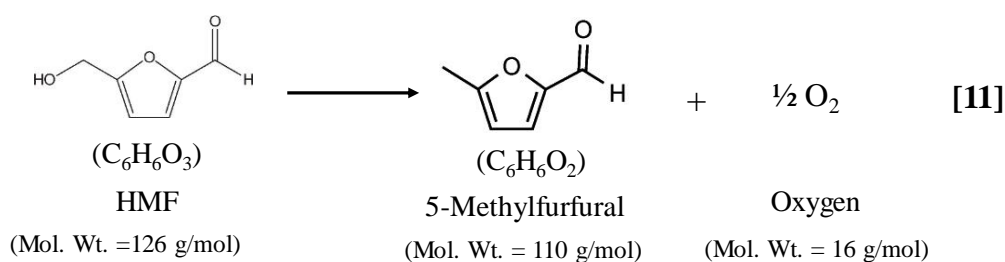

Reaction [11] show the conversion of HMF into 5-methylfurfural and oxygen. The stoichiometry of reaction [11] on weight basis is as follows,

126 gm of HMF gives 110 gm of 5-methylfurfural and 16 gm of oxygen

Thus, 1 gm of HMF gives 0.873 gm of 5-methylfurfural and 0.126 gm of oxygen

**For pyrolysis temperature in between 400 °C – 500 °C:**

The decrease in HMF yield = 1.9 wt%

Increase in 5-methylfurfural yield = 0.96 wt%

The yield of HMF required to produce 0.96 wt% of 5-methylfurfural =  $0.873 \times 0.96 = 0.84$  wt%

Thus, the comparison between the experimental yields of HMF and 5-methylfurfural showed 1 wt% difference, however, the HMF yield could only closely matched with the 5-methylfurfural yield amongst all the pyrolysis products, over 400 °C – 500 °C.

## Appendix 2

[A]: LGA conversion into 3, 4-Altrosan during xylan thin-film pyrolysis

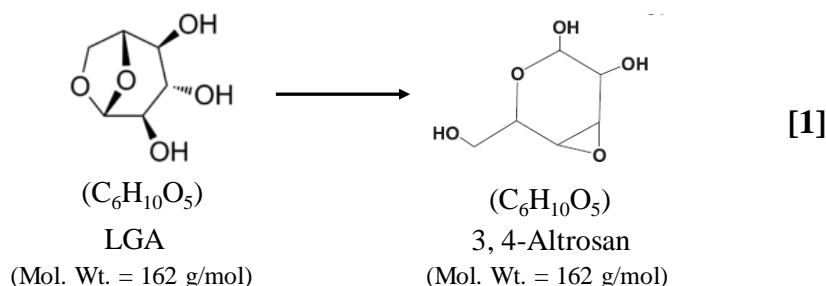

Reaction [1] show the conversion of LGA into 3,4-altrosan. The stoichiometry of reaction [1] on weight basis is as follows,

162 gm of LGA gives 162 gm of 3, 4-Altrosan

Thus, 1 gm of LGA gives 1 gm of 3, 4-Altrosan

**For increase in the pyrolysis temperature from 200 °C to 300 °C:**

The decrease in LGA yield = 3.01 wt%

Increase in 3, 4-Altrosan yield = 3.5 wt%

The yield of LGA required to produce 3.5 wt% of 3, 4-Altrosan =  $1 \times 3.5 = 3.5$  wt%

Thus, 3.5 wt % of 3, 4-Altrosan is produced from 3.5 wt% of LGA, which apparently agreed with the decrease in LGA yield (~ 3.05 wt%) in between 200 °C – 300 °C.

[B]: LGA conversion into 1-Hydroxy-2-butanone and Acetic acid during xylan thin-film pyrolysis

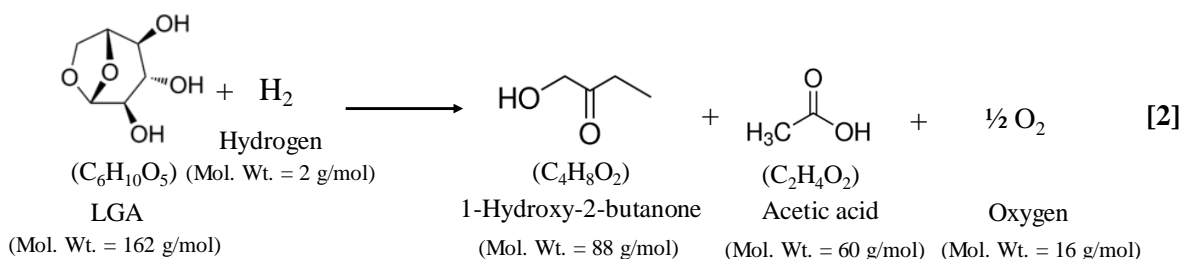

Reaction [2] show that LGA combines with insitu hydrogen and result in the formation of 1-hydroxy-2-butanone and acetic acid, and oxygen. The oxygen generated apparently used (as insitu) in the formation of other products of xylan thin-film pyrolysis as shown later in appendix 2[D]. The stoichiometry of reaction [2] on weight basis is as follows,

164 gm of LGA/H<sub>2</sub> gives 88 gm of 1-hydroxy-2-butanone, 60 gm of acetic acid, and 16 gm of oxygen

Thus, 1 gm of LGA/H<sub>2</sub> gives 0.536 gm of 1-hydroxy-2-butanone and 0.365 gm of acetic acid

**For increase in the pyrolysis temperature from 300 °C to 500 °C:**

The decrease in LGA yield = 3.5 wt%

Increase in 1-hydroxy-2-butanone yield = 2.66 wt%

Increase in acetic acid yield = 1.77 wt%

The yield of LGA required to produce 2.66 wt% of 1-hydroxy-2-butanone =  $0.536 \times 2.66 = 1.42$  wt%

The yield of LGA required to produce 1.77 wt% of acetic acid =  $0.365 \times 1.77 = 0.65$  wt%

Thus, 2.66 wt % of 1-hydroxy-2-butanone and 1.77 wt% of acetic acid are produced from 2.07 wt% LGA, which closely matched with the decrease in LGA yield (~ 3.05 wt%) in between 300 °C – 500 °C.

**[C]:** 3, 4-Altrosan conversion into Hydroxyacetone and Acetaldehyde, and Carbon dioxide during xylan thin-film pyrolysis

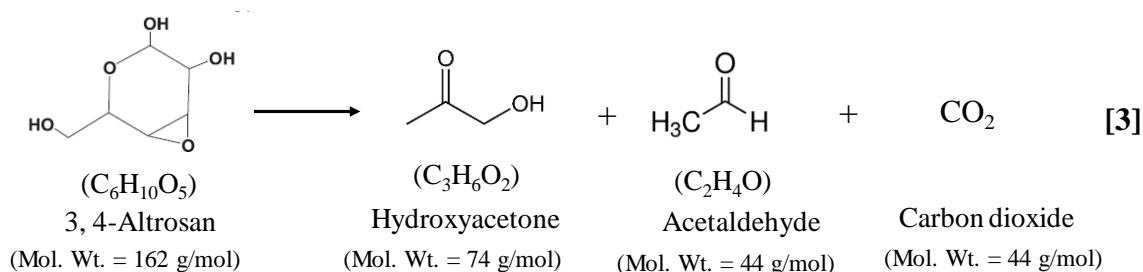

Reaction [3] show the conversion of 3, 4-altrosan into hydroxyacetone, acetaldehyde, and carbon dioxide. The stoichiometry of reaction [3] on weight basis is as follows,

162 gm of 3, 4-altrosan gives 74 gm of hydroxyacetone, 44 gm of acetaldehyde, and 44 gm of carbon dioxide

Thus, 1 gm of 3, 4-altrosan gives 0.456 gm of hydroxyacetone, 0.271 gm of acetaldehyde, and 0.271 gm of carbon dioxide

**For increase in the pyrolysis temperature from 300 °C to 500 °C:**

Decrease in 3, 4-altrosan yield = 4.3 wt%

Increase in hydroxyacetone yield = 4.66 wt%

Increase in acetaldehyde yield = 2.65 wt%

Increase in carbon dioxide yield = 4.4 wt%

The yield of 3, 4-altrosan required to produce 4.66 wt% of hydroxyacetone =  $0.456 \times 4.66 = 2.12$  wt%

The yield of 3, 4-altrosan required to produce 2.65 wt% of acetaldehyde =  $0.271 \times 2.65 = 0.72$  wt%



The yield of 3, 4-altrosan required to produce 4.4 wt% of carbon dioxide =  $0.271 \times 4.4 = 1.19$  wt%

Thus, 4.66 wt % of hydroxyacetone, 2.65 wt% of acetaldehyde, and 4.4 wt% of carbon dioxide are produced from 4.03 wt% of 3, 4-altrosan, which apparently agreed with the decrease in 3, 4-altrosan yield ( $\sim 4.3$  wt%) in between  $300\text{ }^{\circ}\text{C} - 500\text{ }^{\circ}\text{C}$ .

**[D]:** HMF conversion into 2(3H)-Furanone, 5-methyl and and Carbon dioxide during xylan thin-film pyrolysis

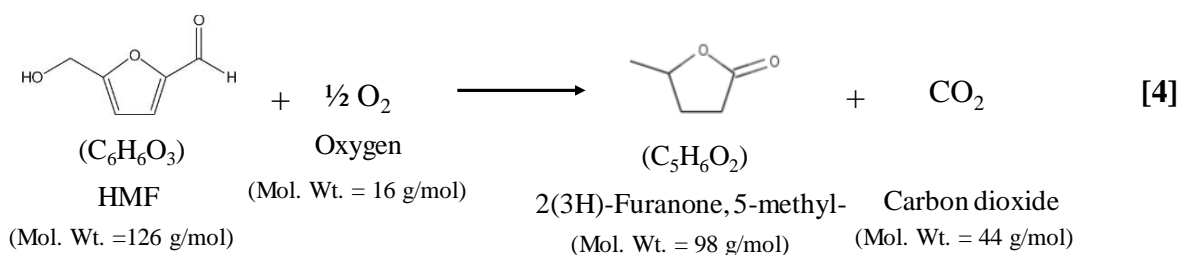

Reaction [4] show that HMF combines with the insitu generated oxygen (possible the oxygen generated from reaction [2 & 5] in appendix [B] as shown earlier) and converted into 2(3H)-Furanone, 5-methyl and Carbon dioxide. The stoichiometry of reaction [4] on weight basis is as follows,

142 gm of HMF/O<sub>2</sub> gives 98 gm of 2(3H)-Furanone, 5-methyl and 44 gm of carbon dioxide  
 Thus, 1 gm of HMF/O<sub>2</sub> gives 0.69 gm of 2(3H)-Furanone, 5-methyl and 0.309 gm of carbon dioxide

**For increase in the pyrolysis temperature from  $200\text{ }^{\circ}\text{C}$  to  $300\text{ }^{\circ}\text{C}$ :**

Decrease in HMF yield = 2.2 wt%

Increase in 2(3H)-Furanone, 5-methyl yield = 2.36 wt%

Increase in carbon dioxide yield = 0.15 wt%

The yield of HMF required to produce 2.21 wt% of 2(3H)-Furanone, 5-methyl =  $0.69 \times 2.36 = 1.65$  wt%

The yield of HMF required to produce 0.15 wt% of carbon dioxide =  $0.309 \times 0.15 = 0.05$  wt%

Thus, 2.36 wt % of 2(3H)-Furanone, 5-methyl and 0.15 wt% of carbon dioxide are produced from 1.7 wt% of HMF, which closely matched with the decrease in HMF yield ( $\sim 2.2$  wt%) in between  $200\text{ }^{\circ}\text{C} - 300\text{ }^{\circ}\text{C}$ .

**[E]:** HMF conversion into Acetylfuran during xylan thin-film pyrolysis

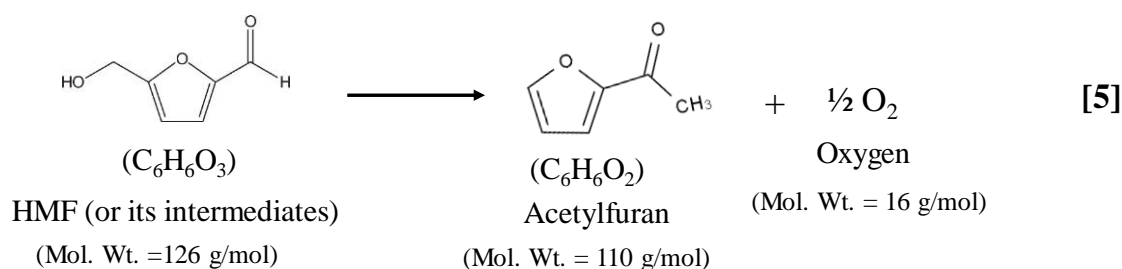

Reaction [5] show the conversion of HMF into acetylfuran and oxygen. HMF as such cannot form acetylfuran, however, its intermediate can result into acetylfuran formation during cellulose pyrolysis.<sup>2</sup> The stoichiometry of reaction [5] on weight basis is as follows,

126 gm of HMF/intermediates gives 110 gm of acetylfuran and 16 gm of oxygen

1 gm of HMF/intermediates gives 0.873 gm of acetylfuran

**For increase in the pyrolysis temperature from 300 °C to 500 °C:**

Decrease in HMF yield = 4.4 wt%

Increase in acetylfuran yield = 3.99 wt%

Increase in formaldehyde yield = 3.68 wt%

The yield of HMF/intermediates required to produce 3.99 wt% of acetylfuran =  $0.873 \times 3.99 = 3.48$  wt%

Thus, 3.99 wt % of acetylfuran is produced from 3.48 wt% of HMF/intermediates, which apparently agrees with the decrease in HMF yield (~ 4.4 wt%) in between 300 °C – 500 °C.

**[F]:** Furfural conversion into Hydroxy acetaldehyde and Methyl glyoxal during xylan thin-film pyrolysis

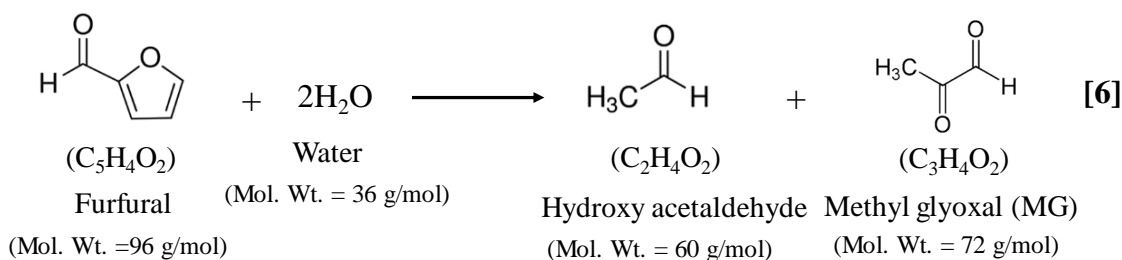

Reaction [6] show that furfural reacted with water and convert into hydroxy acetaldehyde and methyl glyoxal. The stoichiometry of reaction [6] on weight basis is as follows,

132 gm of furfural/H<sub>2</sub>O gives 60 gm of hydroxy acetaldehyde and 72 gm of methyl glyoxal

Thus, 1 gm of furfural/H<sub>2</sub>O gives 0.454 gm of hydroxy acetaldehyde and 0.545 gm of methyl glyoxal

**For increase in the pyrolysis temperature from 200 °C to 400 °C:**

Decrease in furfural yield = 7.1 wt%

Increase in hydroxy acetaldehyde yield = 0.7 wt%

Increase in methyl glyoxal yield = 4.82 wt%

The yield of furfural required to produce 0.71 wt% of hydroxy acetaldehyde =  $0.454 \times 0.71 = 0.32$  wt%

The yield of furfural required to produce 4.82 wt% of methyl glyoxal =  $0.545 \times 4.82 = 2.63$  wt%

Thus, 0.7 wt % of hydroxy acetaldehyde and 4.82 wt% of methyl glyoxal are produced from 2.93 wt% of furfural. This is the best match we could obtain for the decrease in furfural in between 200 °C – 400 °C, when compared with the yields of other pyrolysis products.

**[G]:** Furfural conversion into 2(3H), furanone, 5-methyl during xylan thin-film pyrolysis

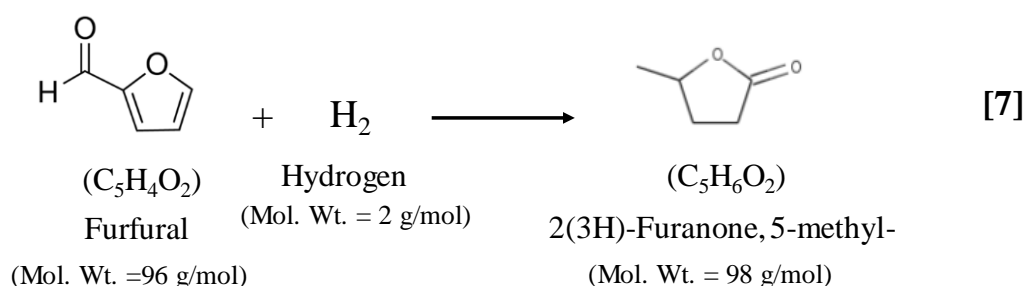

Reaction [7] show that furfural hydrogenated with insitu hydrogen and converted into 2(3H), furanone, 5-methyl. The stoichiometry of reaction [7] on weight basis is as follows,

98 gm of furfural/H<sub>2</sub> gives 98 gm of 2(3H)-Furanone, 5-methyl-

Thus, 1 gm of furfural/H<sub>2</sub> gives 1 gm of 2(3H)-Furanone, 5-methyl-

**For increase in the pyrolysis temperature from 400 °C to 500 °C:**

Decrease in furfural yield = 0.37 wt%

Increase in 2(3H)-Furanone, 5-methyl yield = 0.34 wt%

The yield of furfural required to produce 0.34 wt% of 2(3H)-Furanone, 5-methyl =  $1 \times 0.34 = 0.34$  wt%

Thus, 0.34 wt % of 2(3H)-Furanone, 5-methyl is produced from 0.34 wt% of furfural, which apparently agreed with the decrease in furfural yield (~ 0.37 wt%) in between 400 °C – 500 °C.

**[H]:** 2-Furanmethanol conversion into 2-Methylfuran and Oxygen during xylan thin-film pyrolysis

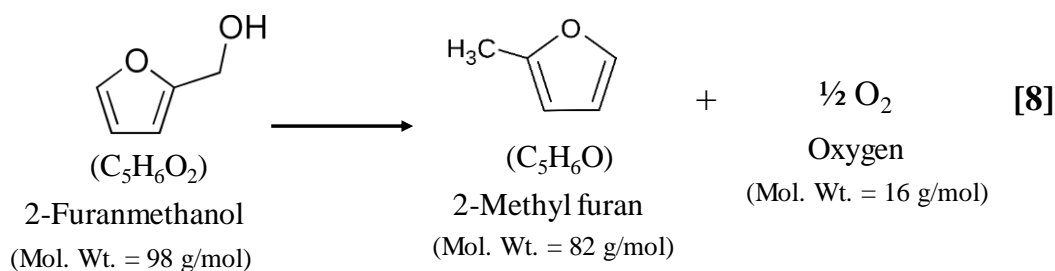

Reaction [8] show the conversion of 2-furanmethanol into 2-methylfuran and oxygen. The stoichiometry of reaction [8] on weight basis is as follows,

98 gm of 2-furanmethanol gives 82 gm of 2-methylfuran and 16 gm of oxygen

Thus, 1 gm of 2-furanmethanol gives 0.836 gm of 2-methylfuran and 0.163 gm of oxygen

**For increase in the pyrolysis temperature from 400 °C to 500 °C:**

Decrease in 2-furanmethanol yield = 1.42 wt%

Increase in 2-methylfuran yield = 1.41 wt%

The yield of 2-furanmethanol required to produce 1.41 wt% of 2-methylfuran =  $0.836 \times 1.41 = 1.18 \text{ wt\%}$

Thus, 1.41 wt% of 2-methylfuran is produced from 1.18 wt% of 2-furanmethanol, which apparently agreed with the decrease in 2-furanmethanol yield (~ 1.42 wt%) in between 400 °C – 500 °C.

**[I]:** 3-methylcyclopentane, 1,2-dione conversion into 2-cyclohexen-1-ol during xylan thin-film pyrolysis

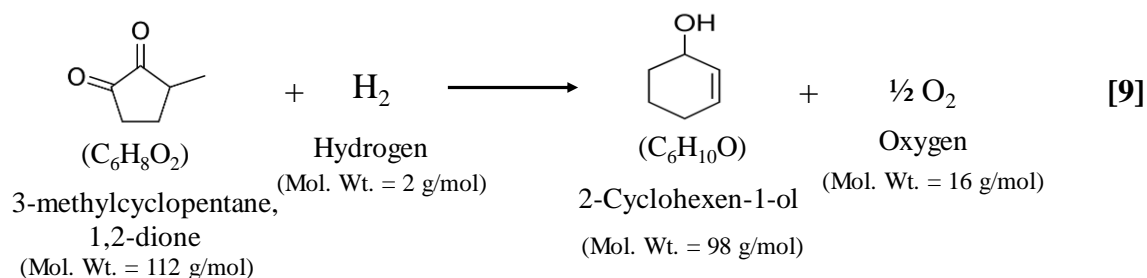

Reaction [9] show that 3-methylcyclopentane, 1,2-dione reacts with hydrogen (as insitu) and converts into 2-cyclohexen-1-ol and oxygen. The stoichiometry of reaction [9] on weight basis is as follows,

114 gm of 3-methylcyclopentane, 1,2-dione/H<sub>2</sub> gives 98 gm of 2-cyclohexen-1-ol and 16 gm of oxygen

Thus, 1 gm of 3-methylcyclopentane, 1,2-dione/H<sub>2</sub> gives 0.859 gm of 2-cyclohexen-1-ol and 0.14 gm of oxygen

**For increase in the pyrolysis temperature from 300 °C to 500 °C:**

Decrease in 3-methylcyclopentane, 1,2-dione yield = 2.78 wt%

Increase in 2-cyclohexen-1-ol yield = 3.01 wt%

The yield of 3-methylcyclopentane, 1,2-dione required to produce 3.01 wt% of 2-cyclohexen-1-ol =  $0.859 \times 3.01 = 2.58$  wt%

Thus, 3.01 wt% of 2-cyclohexen-1-ol is produced from 2.58 wt% of 3-methylcyclopentane, 1,2-dione, which apparently agreed with the decrease in 3-methylcyclopentane, 1,2-dione yield (~ 2.78 wt%) in between 300 °C – 500 °C.

### **Appendix 3**

**[A]:** 2-methoxy-4-vinylphenol conversion into 4-ethyl-2-methoxyphenol during lignin thin-film pyrolysis



Increase in p-Cresol yield = 1.13 wt%

Increase in carbon dioxide yield = 3.79 wt%

The yield of vanillin required to produce 1.13 wt% of p-Cresol =  $0.71 \times 1.13 = 0.8$  wt%

The yield of vanillin required to produce 3.79 wt% of carbon dioxide =  $0.289 \times 3.79 = 1.09$  wt%

Thus, 1.13 wt % of p-Cresol and 3.79 wt% of carbon dioxide are produced from 1.89 wt% of vanillin, which apparently agreed with the decrease in vanillin yield ( $\sim 1.6$  wt%) in between  $350\text{ }^{\circ}\text{C} - 450\text{ }^{\circ}\text{C}$ .

**[C]:** Vanillin conversion into 2-Methylphenol and Carbon dioxide during lignin thin-film pyrolysis

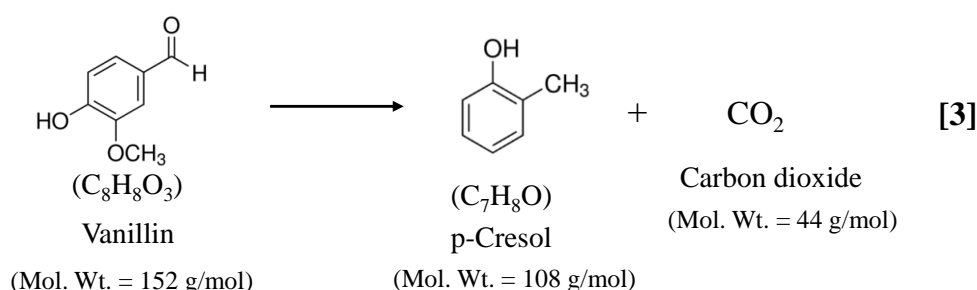

Reaction [3] show the conversion of vanillin into 2-methylphenol and carbon dioxide. The stoichiometry of reaction [3] on weight basis is as follows,

152 gm of vanillin gives 108 gm of 2-methylphenol and 44 gm of carbon dioxide

Thus, 1 gm of vanillin gives 0.71 gm of 2-methylphenol and 0.289 gm of carbon dioxide

**For increase in the pyrolysis temperature from  $450\text{ }^{\circ}\text{C}$  to  $550\text{ }^{\circ}\text{C}$ :**

Decrease in vanillin yield = 1.62 wt%

Increase in 2-methylphenol yield = 1.24 wt%

Increase in carbon dioxide yield = 0.9 wt%

The yield of vanillin required to produce 1.24 wt% of 2-methylphenol =  $0.71 \times 1.24 = 0.88$  wt%

The yield of vanillin required to produce 0.9 wt% of carbon dioxide =  $0.289 \times 0.9 = 0.26$  wt%

Thus, 1.24 wt % of 2-methylphenol and 0.9 wt% of carbon dioxide are produced from 1.14 wt% of vanillin, which closely matched with the decrease in vanillin yield ( $\sim 1.62$  wt%) in between  $450\text{ }^{\circ}\text{C} - 550\text{ }^{\circ}\text{C}$ .

**[D]:** Apocynin conversion into 2, 3-Dimethylphenol and  $\text{C}_1$  compound lignin thin-film pyrolysis

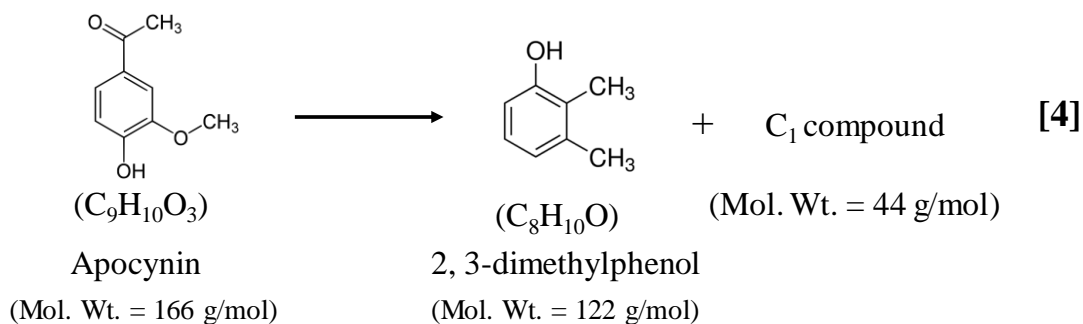

Reaction [4] show the conversion of apocynin into 2, 3-dimethylphenol and C<sub>1</sub> compound. The C<sub>1</sub> compound here could be one of the unidentified pyrolysis product during lignin thin-film pyrolysis. The stoichiometry of reaction [4] on weight basis is as follows,

166 gm of apocynin gives 122 gm of 2, 3-dimethylphenol

Thus, 1 gm of apocynin gives 0.734 gm of 2, 3-dimethylphenol

**For increase in the pyrolysis temperature from 350 °C to 550 °C:**

Decrease in apocynin yield = 5.2 wt%

Increase in 2, 3-dimethylphenol yield = 6.47 wt%

The yield of apocynin required to produce 6.47 wt% of 2, 3-dimethylphenol =  $0.734 \times 6.47 = 4.74 \text{ wt\%}$

Thus, 6.47 wt % of 2, 3-dimethylphenol is produced from 4.74 wt% of apocynin, which is closely matched with the decrease in apocynin yield (~ 5.2 wt%) in between 350 °C – 550 °C.



## Appendix 4

### Density Functional Calculations for Insights into AGF and DAGP formation mechanisms

The activation barriers for AGF and DAGP formation are computed using the methodology reported elsewhere.<sup>1</sup> Density Functional Theoretical (DFT) calculations were performed using the Gaussian 09 code. The reaction schemes for AGF and DAGP formation from glucose, as the reactant, are shown in Figure S1 [A & B]. The transition states of the reaction are shown above the reaction arrow.

AGF formation from  $\beta$ -D-glucopyranose (**1**) involves ring opening to form acyclic D-glucose (**2**), followed by 1,4-acetal bond formation in (**2**) generating  $\beta$ -D-glucofuranose (**3**). The 5-membered glucofuranose (**3**) undergoes 1,6-acetal bond with dehydration in a concerted fashion, forming AGF (**4**).<sup>3-5</sup> Generation of  $\beta$ -D-glucofuranose (**3**) is the most crucial step responsible for AGF formation.<sup>6</sup> DFT computed activation enthalpies of the three steps involved in AGF formation i.e., AG-ts1, AG-ts2 and AG-ts3 are 45.4, 38.3 and 54.7 kcal.mol<sup>-1</sup>, respectively. The activation enthalpy values indicate that dehydration accompanied by 1,6-acetal bond formation, i.e., AG-ts3, is the rate-limiting-step during AGF formation from glucopyranose.

DAGP is an anhydrosugar comprising of 1,4 and 3,6 acetal bonds of the pyranose ring.<sup>5,7</sup> An often referenced mechanism<sup>6</sup> for DAGP formation discarded DAGP formation from  $\beta$ -D-glucopyranose (**1**) due to difference in the orientation of OH group at C<sub>1</sub> in  $\beta$ -D-glucopyranose, which hinders 1,4-acetal bond formation. But  $\beta$ -D-glucopyranose (**1**) can readily undergo ring opening to D-glucose (**2**), which can further cyclize to form  $\alpha$ -D-glucopyranose (**5**). This is followed by 1,4-acetal bond formation and simultaneous loss of water from O<sub>1</sub>H and H<sub>4</sub> atoms generating 1,4-anhydroglucopyranose (**6**). Loss of another water molecule from (**6**) i.e., O<sub>6</sub>H and H<sub>3</sub> atoms, along with 3,6-acetal bond formation results in DAGP (**7**). The activation enthalpies of all the steps in the pathway of DAGP formation from glucose are 45.4, 37.6, 59.2 and 70.7 kcal.mol<sup>-1</sup>, respectively. Therefore, 3,6-acetal bond formation step (DA-ts3) is the rate-limiting step.

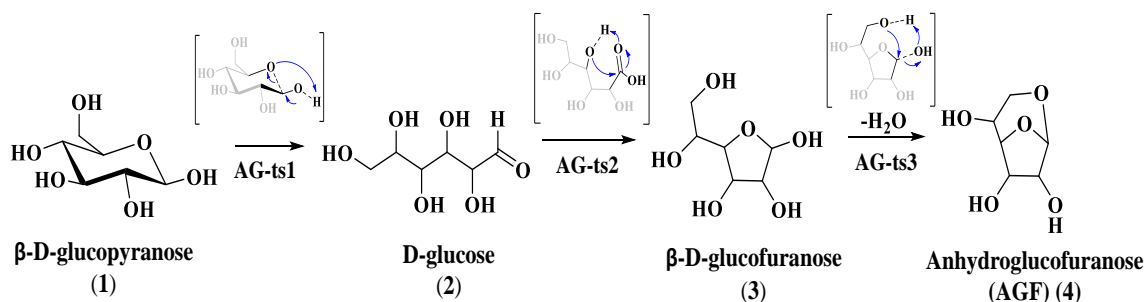

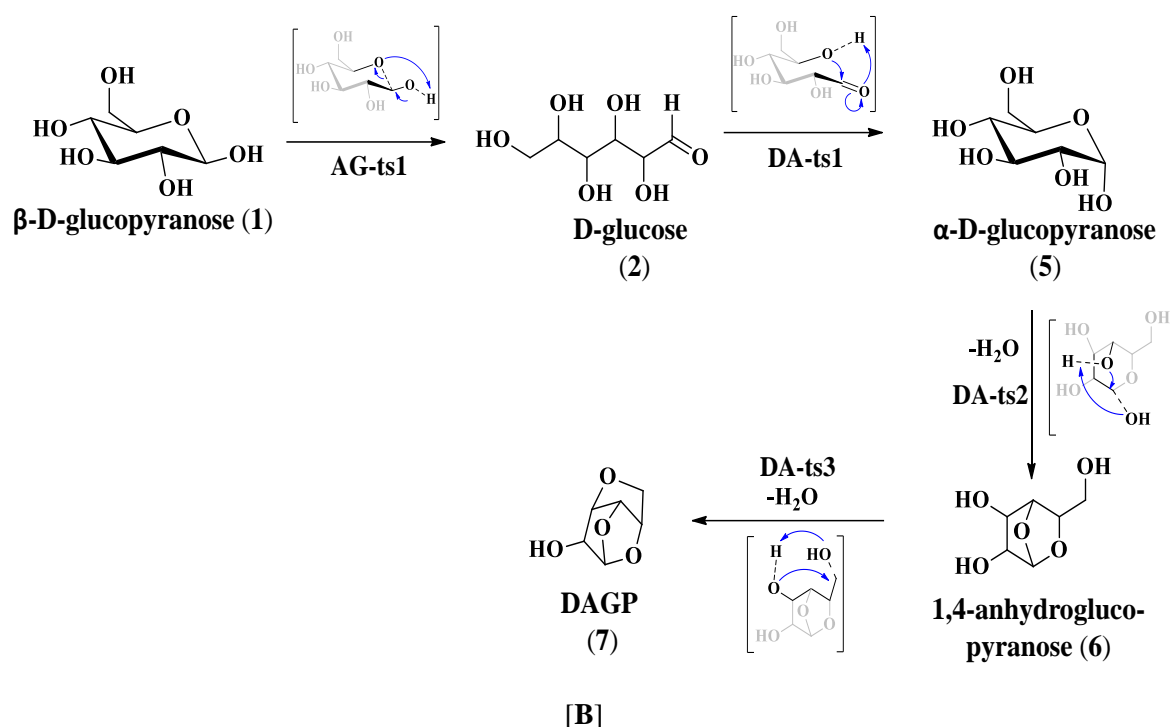

Figure S1: Reaction scheme for [A] 1,6-Anhydroglucofuranose (AGF) [B] 1,4,3,6-dianhydro- $\alpha$ -D-glucopyranose (DAGP) formation from glucose. The blue arrows in the molecular structures show the electron flow during the reaction. Transition states of the reactions are illustrated above the arrow (in brackets), where the atoms not taking part in the reaction are faded.

## References

1. Ansari, K. B.; Arora, J. S.; Chew, J. W.; Dauenhauer, P. J.; Mushrif, S. H., Effect of Temperature and Transport on the Yield and Composition of Pyrolysis-Derived Bio-Oil from Glucose. *Energy Fuels* **2018**.
2. Bodachivskyi, I.; Kuzhiumparambil, U.; Williams, D. B. G., Acid-Catalyzed Conversion of Carbohydrates into Value-Added Small Molecules in Aqueous Media and Ionic Liquids. *ChemSusChem* **2018**, *11* (4), 642-660.
3. Trendewicz, A.; Evans, R.; Dutta, A.; Sykes, R.; Carpenter, D.; Braun, R., Evaluating the Effect of Potassium on Cellulose Pyrolysis Reaction Kinetics. *Biomass Bioenergy* **2015**, *74*, 15-25.
4. Seshadri, V.; Westmoreland, P. R., Concerted reactions and mechanism of glucose pyrolysis and implications for cellulose kinetics. *J. Phys. Chem. A* **2012**, *116* (49), 11997-2013.
5. Hu, B.; Lu, Q.; Jiang, X.-y.; Dong, X.-c.; Cui, M.-s.; Dong, C.-q.; Yang, Y.-p., Insight into the Formation of Anhydrosugars in Glucose Pyrolysis: A Joint Computational and Experimental Investigation. *Energy Fuels* **2017**, *31* (8), 8291-8299.

6. Hu, B.; Lu, Q.; Jiang, X.-y.; Dong, X.-c.; Cui, M.-s.; Dong, C.-q.; Yang, Y.-p., Insight into the Formation of Anhydrosugars in Glucose Pyrolysis: A Joint Computational and Experimental Investigation. *Energy Fuels* **2017**, *31* (8), 8291-8299.
7. Mettler, M. S.; Paulsen, A. D.; Vlachos, D. G.; Dauenhauer, P. J., Pyrolytic conversion of cellulose to fuels: levoglucosan deoxygenation via elimination and cyclization within molten biomass. *Energ. Environ. Sci.* **2012**, *5* (7), 7864-7868.
